# Supplementary material for: Epigenetic Changes Induced by High Glucose in Human Pancreatic Beta Cells
Source: Hindawi journal article supplement (doi:10.1155/2023/9947294), 2023-02-13
Supplement: f1 [file 9947294.f1.pdf]

**Supplementary data can be found at the following links:**

Main Supplementary Data Folder

<https://drive.google.com/drive/u/0/folders/1J80zzwrZb6S7CgHVvzkIXR-Av6lj-1nf>

Supplement 1a

[https://docs.google.com/spreadsheets/d/10npdt2\\_UEH9T3gX3d3qZlkm07mf5mtJf/edit#gid=1906293732](https://docs.google.com/spreadsheets/d/10npdt2_UEH9T3gX3d3qZlkm07mf5mtJf/edit#gid=1906293732)

Supplement 1b

[https://docs.google.com/spreadsheets/d/1\\_SKHu\\_rP3wDacDzDqUUS\\_zN88XaEVhUx/edit#gid=1273186519](https://docs.google.com/spreadsheets/d/1_SKHu_rP3wDacDzDqUUS_zN88XaEVhUx/edit#gid=1273186519)

Supplement 2

<https://docs.google.com/spreadsheets/d/17tIE8xz3xbaNPrI9Iz18YZXOmjF4qlpt/edit#gid=407977637>

Supplement 3

[https://docs.google.com/spreadsheets/d/1vV9kzpqkS4Zoc\\_4Hmi3IMrXrvZhpw19v/edit#gid=386233314](https://docs.google.com/spreadsheets/d/1vV9kzpqkS4Zoc_4Hmi3IMrXrvZhpw19v/edit#gid=386233314)

Supplement 4

[https://docs.google.com/spreadsheets/d/1AL4RfE4s6pXee\\_l3VtntmJOuxiPoF3N\\_/edit#gid=1482670607](https://docs.google.com/spreadsheets/d/1AL4RfE4s6pXee_l3VtntmJOuxiPoF3N_/edit#gid=1482670607)

Supplement 5

<https://docs.google.com/spreadsheets/d/1dx1aDfZTWEsROtmGMUjnILmYDda5qmSX/edit#gid=1594460684>
